# Supplementary material
Source: PubMed Central journal article supplement (PMC3946456)
Supplement: NIHMS533276-supplement-1_si_001.pdf [file NIHMS533276-supplement-1_si_001.pdf]

**Supporting information for**

# **In vivo safety evaluation of polyarginine coated magnetic nanovectors**

*Omid Veisheh<sup>a,b</sup>, Forrest M. Kievit<sup>b</sup>, Vicki Liu<sup>c</sup>, Chen Fang<sup>d</sup>, Zachary R. Stephen<sup>a</sup>, Richard G. Ellenbogen<sup>b</sup>, and Miqin Zhang<sup>a,b,\*</sup>*

<sup>a</sup>Department of Materials Science and Engineering, University of Washington, Seattle, Washington 98195

<sup>b</sup>Department of Neurological Surgery, University of Washington, Seattle, Washington 98195

<sup>c</sup>Department of Bioengineering, University of Washington, Seattle, Washington 98195

<sup>d</sup>Fred Hutchinson Cancer Research Center, Seattle, Washington 98195

## Supplementary Figure

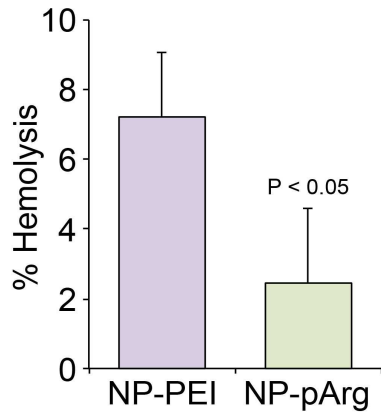

**Supplemental Figure 1.** Quantitative analysis for degree of hemolysis. NP-pArg treatment induced negligible hemolysis. Conversely, treatment with NP-PEI induced significantly higher ( $p < 0.05$ ) hemolysis, which was 3-fold higher than NP-pArg levels.
